# Supplementary material
Source: PubMed Central journal article supplement (PMC8166049)
Supplement: pnas.2018856118.sapp.pdf [file pnas.2018856118.sapp.pdf]

# Supporting information for “Coastal eutrophication drives acidification, oxygen loss and ecosystem change in a major oceanic upwelling system”

Fayçal Kessouri<sup>a,b,1</sup>, James C. McWilliams<sup>b</sup>, Daniele Bianchi<sup>b</sup>, Martha Sutula<sup>a</sup>, Lionel Renault<sup>b,c</sup>, Curtis Deutsch<sup>d</sup>, Richard A. Feely<sup>e</sup>, Karen McLaughlin<sup>a</sup>, Minna Ho<sup>a</sup>, Evan Howard<sup>d</sup>, Nina Bednaršek<sup>a</sup>, Pierre Damien<sup>b</sup>, Jeroen Molemaker<sup>b</sup>, and Stephen B. Weisberg<sup>a</sup>

<sup>a</sup> Southern California Coastal Water Research Project, Costa Mesa, CA; <sup>b</sup> Department of Atmospheric and Oceanic Sciences, University of California Los Angeles, CA; <sup>c</sup> Laboratoire d'Études en Géophysique et Océanographie Spatiale, Toulouse, France; <sup>d</sup> School of Oceanography, University of Washington, WA; <sup>e</sup> Pacific Marine Environmental Laboratory, National Oceanic and Atmospheric Administration, WA

## Content of the file

### List of Tables

Table S1 Multi-year average loads of total nitrogen from different anthropogenically-enhanced sources in the Southern California Bight averaged between 1997-2000.

Table S2 Surface chlorophyll *a* concentration for the months of February to July, averaged by regions shown in Figure S2. The first column shows results from the CTRL simulation, the second column from the ANTH simulation, the third column the absolute difference (ANTH-CTRL), and the fourth column the relative difference expressed as percent ( $100 \times [\text{ANTH}-\text{CTRL}]/\text{CTRL}$ ).

Table S3 Same as Table S2 for the total primary production rate in the upper ocean (0-40 m depth).

Table S4 Same as Table S2 except for particulate carbon export at 40 m depth and during the May-August (stratified) period.

Table S5 Same as Table S4 for respiration rate at sub-surface (40-80 m depth).

Table S6 Oxygen averaged by regions of Figure S2 for the months of May to August. The first column shows average values from the CTRL simulation, the second column average values from the ANTH simulation, the third column the mean change (ANTH-CTRL), and the fourth column the maximum change, here defined as the 95th percentile of the frequency distribution of the change for each regions. The fifth column is the average change in

- May to August of El Niño year 1997-1998
- Table S7 Same as Table S4 for CO<sub>2</sub> air-sea flux
- Table S8 Same as Table S6 for  $\Omega_{Ar}$ .
- Table S9 Same as Table S6 for pH (Sea water scale).
- Table S10 Same as Table S4 for N<sub>2</sub>O air-sea out-flux.

## List of Figures

- Figure S1 Areas of the distinct regions and coast (0-15 km) used for analyses (Tables S2 to S10). Yellow circles are the locations of the four large POTW outfalls. Black squares are the locations of small POTW outfalls. Small green triangles are the locations of river mouth discharge. Green outline represents the Greater Los Angeles region. Grey boxes indicate marine protected areas (MPAs) cited in section "Effects on fisheries and vulnerable habitats". For reference, names of locations are shown on the maps as follow: PD = Point Dume, LAH = Los Angeles Harbor, SP Bay = San Pedro Bay, NB = Newport Beach.
- Figure S2 ROMS-BEC model one-way nests to down-scale to the configuration used in this study. The U.S. West Coast domain run at a horizontal resolution of 4 km is shown by the black box, the Southern California Current domain run at 1 km is shown by the blue box, and the SCB domain run at 0.3 km is shown by the red box. Colors show topography from the 4 km simulation. Adapted from (26).
- Figure S3 Time series of all large POTW summed a) volume flux, b) organic N flux and c) dissolved inorganic N flux for 1971-2000. . . . . 16
- Figure S4 Comparison of ANTH vs CTRL runs expressing concentrations of ammonium and nitrate along a cross-section in Santa Monica bay. The concentration is an average during winters. The left panels are the anthropogenic runs (ANTH), the right panels are control run (CTRL). The top panels ammonium concentrations, and the bottom are the nitrate concentrations. These panels express the transport of nitrate and ammonium to the upper layer by the buoyant plume ...
- Figure S5 Time series of the percent difference (ANTH - CTRL / CTRL) in Santa Monica Bay at 40 m depth between Feb 1997 and Jan 2001. The shaded region shows the El Niño time period. Upper: oxygen, middle: pH, lower: omega aragonite. Note the depletion of subsurface oxygen caused by the increased respiration of exported organic matter developed by eutrophication.
- Figure S6 (a) Seasonal vertically-integrated primary production showing the strong effect of El Niño 98. S is spring [March to June], W is fall to winter period [October to February]. (b) is the fraction of primary production between ANTH/CTRL. Winter and spring of 1998 are the seasons with the greatest change by anthropogenic (+100%). ENSO season presents a strong stratification and weak nutrients supply by upwelling, the main delivery of inorganic nutrients is then provided by anthropogenic sources.
- Figure S7 Comparison of nitrate in winter during El Niño (ENSO in 1998) and a non-ENSO year (1999) in January and February in Santa Monica Bay. The isolines are the water density lines. The cross sections illustrate that the pycnocline is much deeper during ENSO, therefore, the only source of nutrients in the upper layer of Santa Monica Bay during ENSO comes from POTW submarine pipes. While during 1999, the source if inorganic nitrogen combines from deep ocean and POTW.
- Figure S8 Multi-year (1997-1999) averages of integrated nitrification in Los Angeles region. It shows the intensified nitrification rate at the locations of the submarine pipes.

Figure S9 Surface N<sub>2</sub>O saturation state averaged over three winters [1997-1999]. It shows local increase of surface N<sub>2</sub>O saturation state in the location of the intensified NH<sub>4</sub> plume. The excess in N<sub>2</sub>O saturation state in ANTH run results from the intensification of the nitrification rates as shown in S8.

Figure S10 Evolution of the tolerance depth of giant kelp *Macrocystis pyrifera* in San Pedro and Ventura shelves (as shown in yellow in the domain panel, top left.). Top right panel shows a climatology of the tolerance depth of *Macrocystis pyrifera* in CTRL run Vs ANTH run. Bottom left panel illustrates a climatology (1997-1999) of the relative change in the tolerance depth of *Macrocystis pyrifera* shown in the top right panel. The bottom right panel is the absolute change of the tolerance depth of *Macrocystis pyrifera*. These analysis are showing the possible change caused by the eutrophication.

Figure S11 Climatology of the mixed layer depth in the south (San Diego area), center (Los Angeles coast) and north (Santa Barbara coast) of the SCB.

| Terrestrial and Atmospheric Loads   |                                              |
|-------------------------------------|----------------------------------------------|
|                                     | Total Nitrogen loads (kg N d <sup>-1</sup> ) |
| Atmospheric deposition              | 8,589                                        |
| Rivers                              | 17,975                                       |
| Coastal outfalls, 4 large POTWs     | 148,170                                      |
| Coastal outfalls, other small POTWs | 21,445                                       |
| Total                               | 196,179                                      |

**Table S1. Multi-year average loads of total nitrogen from different anthropogenically-enhanced sources in the Southern California Bight averaged between**

|                                      | Surface total phytoplankton |       |             |          |                |                |                       |                    |
|--------------------------------------|-----------------------------|-------|-------------|----------|----------------|----------------|-----------------------|--------------------|
|                                      | CTRL                        | ANTH  | Mean Change | % Change | CTRL (El Niño) | ANTH (El Niño) | Mean Change (El Niño) | % Change (El Niño) |
| All Coast [0-15 km]                  | 8.75                        | 11.77 | 3.01        | +79      | 3.85           | 6.99           | 3.14                  | +129               |
| Santa Barbara                        | 15.51                       | 15.66 | 0.14        | +7.8     | 6.12           | 8.14           | 2.02                  | +56                |
| Ventura                              | 9.64                        | 11.82 | 2.18        | +44      | 4.13           | 6.59           | 2.45                  | +84                |
| Santa Monica                         | 8.70                        | 13.22 | 4.51        | +87      | 4.00           | 8.74           | 4.74                  | +162               |
| Los Angeles                          | 7.02                        | 14.09 | 7.06        | +192     | 3.31           | 9.51           | 6.19                  | +278               |
| San Pedro                            | 5.66                        | 17.72 | 12.05       | +367     | 2.81           | 12.61          | 9.80                  | +495               |
| Orange County                        | 4.45                        | 6.66  | 2.20        | +59      | 2.40           | 4.49           | 2.08                  | +97                |
| San Diego North                      | 4.80                        | 7.22  | 2.41        | +68      | 2.58           | 4.05           | 1.47                  | +62                |
| San Diego South                      | 6.25                        | 9.59  | 3.33        | +76      | 2.79           | 5.36           | 2.56                  | +125               |
| MPA1: Campus Point Santa Barbara     | 15.16                       | 15.51 | 0.34        | +13      | 5.34           | 8.02           | 2.68                  | +71                |
| MPA2: Point Dume Santa Monica        | 8.37                        | 11.25 | 2.87        | +63      | 3.79           | 6.51           | 2.72                  | +102               |
| MPA3: Point Vicente and Abalone Cove | 5.65                        | 11.60 | 5.95        | +130     | 2.97           | 8.65           | 5.68                  | +210               |
| MPA4: Laguna Beach and Dana Point    | 4.93                        | 7.63  | 2.70        | +74      | 2.52           | 5.61           | 3.08                  | +135               |
| MPA5: South La Jolla                 | 6.21                        | 8.84  | 2.63        | +57      | 2.95           | 4.41           | 1.45                  | +63                |
| MPA6: Cabrillo                       | 8.06                        | 11.44 | 3.37        | +57      | 3.30           | 5.55           | 2.24                  | +96                |

biomass (mg C m<sup>-3</sup>) (March-May)

**Table S2. Surface chlorophyll a concentration for the months of February to July, averaged by regions shown in Figure S2. The first column shows results from the CTRL simulation, the second column from the ANTH simulation, the third column the absolute difference (ANTH- CTRL), and the fourth column the relative difference expressed as percent (100\*[ANTH-CTRL]/CTRL).**

| Total Primary Production ( $\text{mmol C m}^{-2} \text{ d}^{-1}$ ) (February-July, 0-40 m depth) |        |        |            |          |
|--------------------------------------------------------------------------------------------------|--------|--------|------------|----------|
|                                                                                                  | CTRL   | ANTH   | Abs Change | % Change |
| All Coast [0-15 km]                                                                              | 88.51  | 108.80 | 20.29      | +23      |
| Santa Barbara                                                                                    | 129.19 | 140.89 | 11.69      | +9       |
| Ventura                                                                                          | 92.79  | 110.08 | 17.29      | +18      |
| Santa Monica                                                                                     | 85.63  | 121.89 | 36.25      | +42      |
| Los Angeles                                                                                      | 76.05  | 114.65 | 38.59      | +50      |
| San Pedro                                                                                        | 63.55  | 114.46 | 50.91      | +80      |
| Orange County                                                                                    | 64.91  | 79.72  | 14.80      | +22      |
| San Diego North                                                                                  | 73.54  | 86.42  | 12.88      | +17      |
| San Diego South                                                                                  | 68.85  | 85.47  | 16.62      | +24      |
| MPA1: Campus Point Santa Barbara                                                                 | 117.90 | 132.94 | 15.03      | +12      |
| MPA2: Point Dume Santa Monica                                                                    | 87.78  | 109.37 | 21.59      | +24      |
| MPA3: Point Vicente and Abalone Cove                                                             | 82.05  | 119.81 | 37.76      | +46      |
| MPA4: Laguna Beach and Dana Point                                                                | 77.94  | 103.39 | 25.45      | +32      |
| MPA5: South La Jolla                                                                             | 73.75  | 86.69  | 12.94      | +17      |
| MPA6: Cabrillo                                                                                   | 56.07  | 70.17  | 14.10      | +25      |

**Table S3. Same as Table S2 for the total primary production rate in the upper ocean (0-40 m depth).**

| Particulate carbon export ( $\text{mmol C m}^{-2} \text{ d}^{-1}$ ) (May-August, at 40 m depth) |        |        |            |          |
|-------------------------------------------------------------------------------------------------|--------|--------|------------|----------|
|                                                                                                 | CTRL   | ANTH   | Abs Change | % Change |
| All Coast [0-15 km]                                                                             | -16.29 | -20.35 | -4.06      | +24      |
| Santa Barbara                                                                                   | -22.67 | -25.02 | -2.34      | +10      |
| Ventura                                                                                         | -16.48 | -19.77 | -3.28      | +19      |
| Santa Monica                                                                                    | -15.92 | -23.43 | -7.50      | +47      |
| Los Angeles                                                                                     | -14.18 | -22.42 | -8.23      | +58      |
| San Pedro                                                                                       | -11.64 | -23.07 | -11.42     | +98      |
| Orange County                                                                                   | -12.74 | -15.18 | -2.44      | +19      |
| San Diego North                                                                                 | -14.42 | -16.63 | -2.21      | +15      |
| San Diego South                                                                                 | -13.91 | -17.63 | -3.72      | +26      |
| MPA1: Campus Point Santa Barbara                                                                | -21.38 | -23.85 | -2.47      | +11      |
| MPA2: Point Dume Santa Monica                                                                   | -16.17 | -20.66 | -4.49      | +27      |
| MPA3: Point Vicente and Abalone Cove                                                            | -14.72 | -20.75 | -6.03      | +40      |
| MPA4: Laguna Beach and Dana Point                                                               | -15.40 | -20.18 | -4.77      | +30      |
| MPA5: South La Jolla                                                                            | -13.89 | -17.46 | -3.56      | +25      |
| MPA6: Cabrillo                                                                                  | -10.64 | -13.93 | -3.29      | +30      |

**Table S4. Same as Table S2 except for particulate carbon export at 40 m depth and during the May-August (stratified) period.**

| Respiration at depth ( $\text{mmol O m}^{-2} \text{d}^{-1}$ ) (May-August, 40-80 m depth) |        |        |            |          |
|-------------------------------------------------------------------------------------------|--------|--------|------------|----------|
|                                                                                           | CTRL   | ANTH   | Abs Change | % Change |
| All Coast [0-15 km]                                                                       | -6.40  | -9.26  | -2.86      | +44      |
| Santa Barbara                                                                             | -11.85 | -14.24 | -2.38      | +20      |
| Ventura                                                                                   | -5.51  | -8.24  | -2.73      | +49      |
| Santa Monica                                                                              | -7.93  | -16.83 | -8.90      | +112     |
| Los Angeles                                                                               | -5.01  | -10.59 | -5.58      | +111     |
| San Pedro                                                                                 | -2.94  | -6.00  | -3.06      | +104     |
| Orange County                                                                             | -3.06  | -4.17  | -1.10      | +36      |
| San Diego North                                                                           | -5.86  | -7.31  | -1.45      | +24      |
| San Diego South                                                                           | -4.09  | -6.28  | -2.19      | +53      |
| MPA1: Campus Point Santa Barbara                                                          | -11.12 | -14.10 | -2.98      | +26      |
| MPA2: Point Dume Santa Monica                                                             | -5.07  | -9.73  | -4.66      | +91      |
| MPA3: Point Vicente and Abalone Cove                                                      | -6.20  | -13.28 | -7.08      | +114     |
| MPA4: Laguna Beach and Dana Point                                                         | -6.82  | -10.70 | -3.88      | +56      |
| MPA5: South La Jolla                                                                      | -9.66  | -14.36 | -4.70      | +48      |
| MPA6: Cabrillo                                                                            | -1.21  | -1.61  | -0.40      | +32      |

**Table S5. Same as Table S4 for respiration rate at subsurface (40-80 m depth).**

| Oxygen ( $\text{mmol O m}^{-3}$ ) (May-August, 40 m depth) |      |      |             |                |                       |                      |
|------------------------------------------------------------|------|------|-------------|----------------|-----------------------|----------------------|
|                                                            | CTRL | ANTH | Mean Change | Maximum change | Mean change (El Niño) | Max change (El Niño) |
| All Coast [0-15 km]                                        | 223  | 222  | -1          | -50            | -8                    | -55                  |
| Santa Barbara                                              | 199  | 197  | -2          | -59            | -10                   | -49                  |
| Ventura                                                    | 229  | 228  | -2          | -42            | -7                    | -46                  |
| Santa Monica                                               | 230  | 222  | -8          | -51            | -13                   | -56                  |
| Los Angeles                                                | 232  | 228  | -4          | -47            | -10                   | -55                  |
| San Pedro                                                  | 232  | 231  | -1          | -42            | -8                    | -53                  |
| Orange County                                              | 238  | 237  | -1          | -49            | -6                    | -58                  |
| San Diego North                                            | 229  | 228  | -1          | -42            | -6                    | -60                  |
| San Diego South                                            | 224  | 220  | -4          | -43            | -11                   | -71                  |
| MPA1: Campus Point Santa Barbara                           | 207  | 205  | -2          | -60            | -8                    | -43                  |
| MPA2: Point Dume Santa Monica                              | 231  | 229  | -2          | -40            | -8                    | -49                  |
| MPA3: Point Vicente and Abalone Cove                       | 231  | 229  | -2          | -42            | -8                    | -51                  |
| MPA4: Laguna Beach and Dana Point                          | 233  | 229  | -4          | -41            | -8                    | -51                  |
| MPA5: South La Jolla                                       | 219  | 213  | -6          | -49            | -10                   | -67                  |
| MPA6: Cabrillo                                             | 209  | 202  | -7          | -52            | -14                   | -65                  |

**Table S6. Oxygen averaged by regions of Figure S2 for the months of May to August. The first column shows average values from the CTRL simulation, the second column average values from the ANTH simulation, the third column the mean change (ANTH-CTRL), and the fourth column the maximum change, here defined as the 95th percentile of the frequency distribution of the change for each regions. The fifth column is the average change in May to August of El Niño year 1997-1998.**

| CO <sub>2</sub> air-sea flux ( $\text{mmol C m}^{-2} \text{d}^{-1}$ ) (May-August) |      |      |            |          |
|------------------------------------------------------------------------------------|------|------|------------|----------|
|                                                                                    | CTRL | ANTH | Abs Change | % Change |
| All Coast [0-15 km]                                                                | 1.21 | 1.76 | 0.54       | +31      |
| Santa Barbara                                                                      | 1.40 | 1.84 | 0.44       | +23      |
| Ventura                                                                            | 1.33 | 1.98 | 0.65       | +32      |
| Santa Monica                                                                       | 0.97 | 1.75 | 0.77       | +44      |
| Los Angeles                                                                        | 0.79 | 1.94 | 1.14       | +58      |
| San Pedro                                                                          | 0.64 | 2.10 | 1.46       | +69      |
| Orange County                                                                      | 0.70 | 0.93 | 0.22       | +24      |
| San Diego North                                                                    | 0.68 | 0.96 | 0.28       | +29      |
| San Diego South                                                                    | 0.71 | 0.92 | 0.21       | +22      |

**Table S7. Same as Table S4 for CO<sub>2</sub> air-sea flux**

| $\Omega_{Ar}$ (May-August, 40 m depth) |      |       |             |                |                       |                      |
|----------------------------------------|------|-------|-------------|----------------|-----------------------|----------------------|
|                                        | CTRL | ANTH  | Mean Change | Maximum change | Mean change (El Niño) | Max change (El Niño) |
| All Coast [0-15 km]                    | 1.66 | 1.64  | -0.016      | -0.47          | -0.11                 | -0.63                |
| Santa Barbara                          | 1.42 | 1.41  | -0.011      | -0.53          | -0.11                 | -0.59                |
| Ventura                                | 1.71 | 1.70  | -0.006      | -0.41          | -0.10                 | -0.53                |
| Santa Monica                           | 1.74 | 1.66  | -0.08       | -0.49          | -0.15                 | -0.63                |
| Los Angeles                            | 1.74 | 1.70  | -0.04       | -0.46          | -0.12                 | -0.61                |
| San Pedro                              | 1.73 | 1.72  | -0.01       | -0.41          | -0.10                 | -0.60                |
| Orange County                          | 1.79 | 1.79  | -0.006      | -0.48          | -0.09                 | -0.69                |
| San Diego North                        | 1.70 | 1.70  | -0.001      | -0.42          | -0.10                 | -0.71                |
| San Diego South                        | 1.66 | 1.62  | -0.038      | -0.42          | -0.14                 | -0.77                |
| MPA1: Campus Point Santa Barbara       | 1.50 | 1.48  | -0.017      | -0.58          | -0.10                 | -0.56                |
| MPA2: Point Dume Santa Monica          | 1.73 | 1.72  | -0.017      | -0.39          | -0.11                 | -0.56                |
| MPA3: Point Vicente and Abalone Cove   | 1.72 | 1.70  | -0.02       | -0.41          | -0.11                 | -0.56                |
| MPA4: Laguna Beach and Dana Point      | 1.74 | -0.03 | -0.08       | -0.41          | -0.11                 | -0.58                |
| MPA5: South La Jolla                   | 1.60 | 1.55  | -0.05       | -0.46          | -0.12                 | -0.76                |
| MPA6: Cabrillo                         | 1.52 | 1.46  | -0.05       | -0.10          | -0.16                 | -0.79                |

**Table S8.** Same as Table S6 for  $\Omega_{Ar}$ .

| pH (May-August, 40 m depth)          |      |      |             |                |                       |                      |
|--------------------------------------|------|------|-------------|----------------|-----------------------|----------------------|
|                                      | CTRL | ANTH | Mean Change | Maximum change | Mean change (El Niño) | Max change (El Niño) |
| All Coast [0-15 km]                  | 7.97 | 7.97 | -0.0043     | -0.09          | -0.012                | -0.10                |
| Santa Barbara                        | 7.92 | 7.92 | -0.002      | -0.10          | -0.014                | -0.08                |
| Ventura                              | 7.99 | 7.98 | -0.003      | -0.08          | -0.01                 | -0.08                |
| Santa Monica                         | 7.99 | 7.97 | -0.017      | -0.10          | -0.02                 | -0.10                |
| Los Angeles                          | 7.99 | 7.98 | -0.01       | -0.09          | -0.014                | -0.10                |
| San Pedro                            | 7.99 | 7.99 | -0.004      | -0.08          | -0.01                 | -0.09                |
| Orange County                        | 8.02 | 8.00 | -0.003      | -0.09          | -0.008                | -0.10                |
| San Diego North                      | 7.99 | 7.99 | 0.00        | -0.08          | -0.01                 | -0.10                |
| San Diego South                      | 7.98 | 7.97 | -0.007      | -0.08          | -0.0173               | -0.12                |
| MPA1: Campus Point Santa Barbara     | 7.94 | 7.94 | -0.0031     | -0.09          | -0.01                 | -0.07                |
| MPA2: Point Dume Santa Monica        | 7.99 | 7.98 | -0.0059     | -0.08          | -0.01                 | -0.09                |
| MPA3: Point Vicente and Abalone Cove | 7.99 | 7.98 | -0.0059     | -0.08          | -0.01                 | -0.09                |
| MPA4: Laguna Beach and Dana Point    | 7.99 | 7.99 | -0.0098     | -0.08          | -0.01                 | -0.09                |
| MPA5: South La Jolla                 | 7.97 | 7.96 | -0.02       | -0.10          | -0.01                 | -0.12                |
| MPA6: Cabrillo                       | 7.95 | 7.94 | -0.02       | -0.097         | -0.02                 | -0.11                |

**Table S9.** Same as Table S6 for pH (Sea water scale).

|                     | CTRL | ANTH | Abs Change | % Change |
|---------------------|------|------|------------|----------|
| All Coast [0-15 km] | 3.10 | 3.34 | 0.24       | +8       |
| Santa Barbara       | 5    | 5.35 | 0.35       | +7       |
| Ventura             | 3.14 | 3.37 | 0.22       | +7       |
| Santa Monica        | 2.27 | 2.56 | 0.29       | +13      |
| Los Angeles         | 1.95 | 2.19 | 0.24       | +12      |
| San Pedro           | 1.68 | 1.87 | 0.2        | +12      |
| Orange County       | 1.24 | 1.35 | 0.1        | +8       |
| San Diego North     | 1.25 | 1.38 | 0.12       | +10      |
| San Diego South     | 1.59 | 1.8  | 0.20       | +13      |

**Table S10.** Same as Table S4 for N<sub>2</sub>O air-sea out-flux.

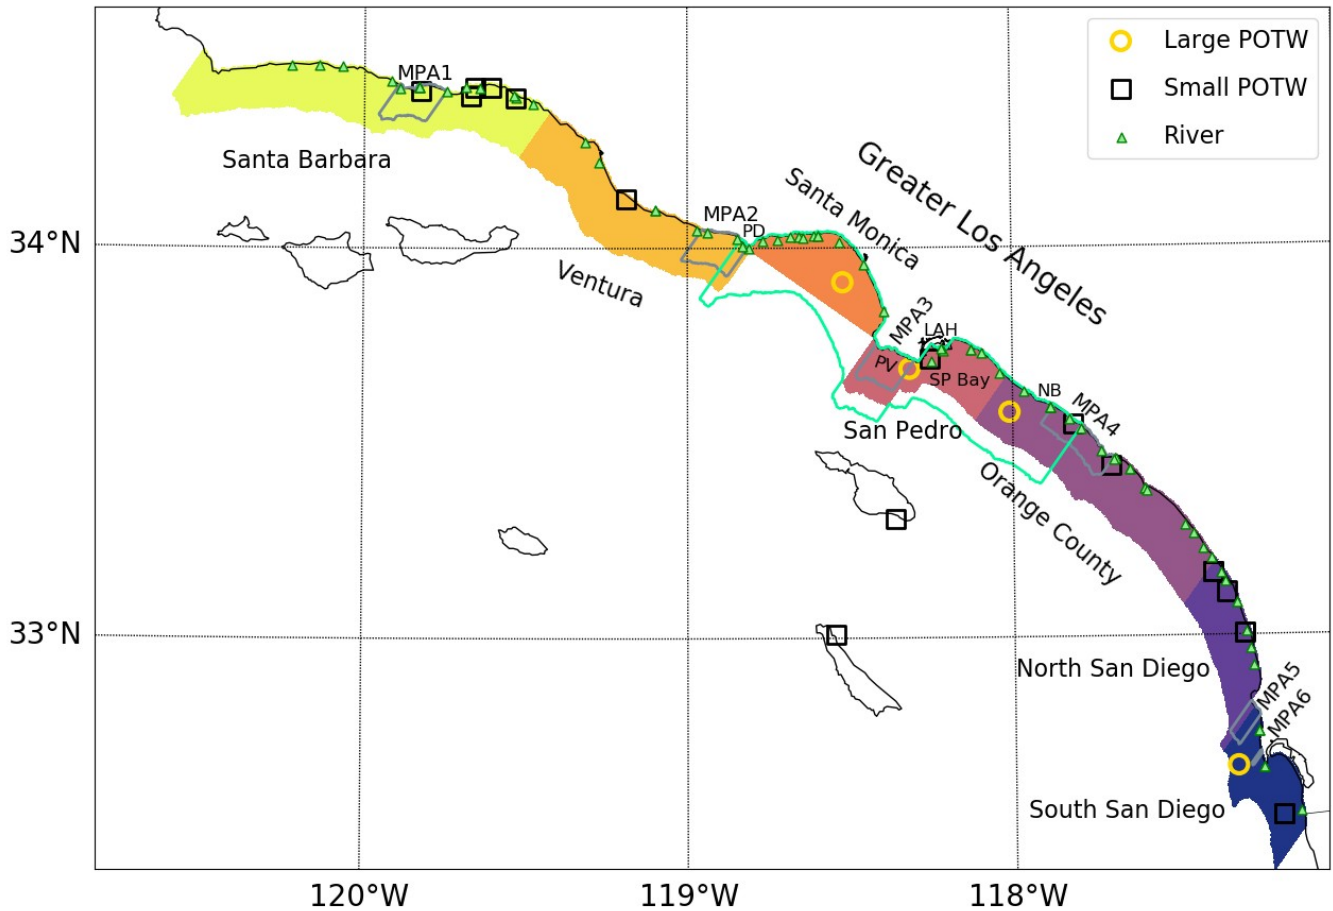

**Fig. S1.** Areas of the distinct regions and coast (0-15 km) used for analyses (Tables S2 to S10). Yellow circles are the locations of the four large POTW outfalls. Black squares are the locations of small POTW outfalls. Small green triangles are the locations of river mouth discharge. Green outline represents the Greater Los Angeles region. Grey boxes indicate marine protected areas (MPAs) cited in section "Effects on fisheries and vulnerable habitats". For reference, names of locations are shown on the maps as follow: PD = Point Dume, LAH = Los Angeles Harbor, SP Bay = San Pedro Bay, NB = Newport Beach.

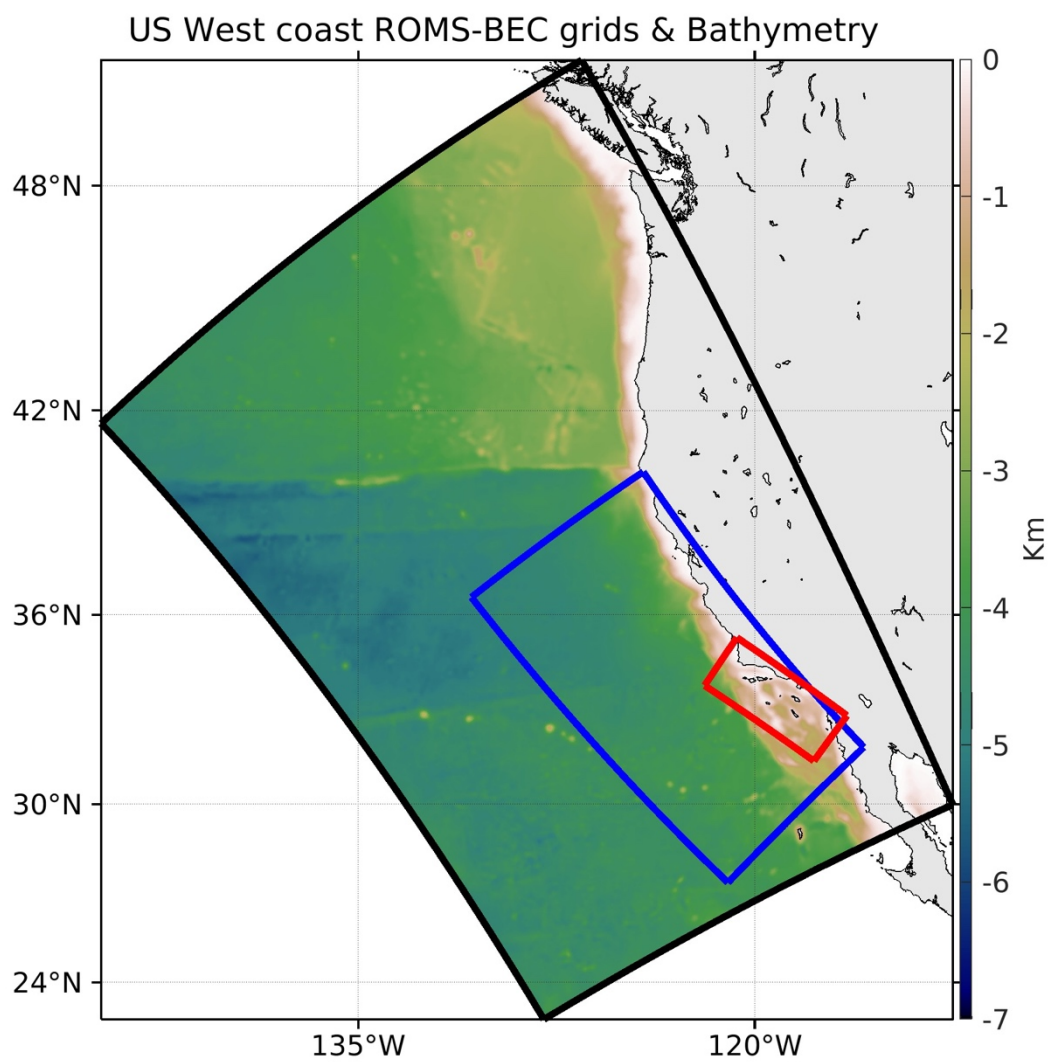

**Fig. S2.** ROMS-BEC model one-way nests to downscale to the configuration used in this study. The U.S. West Coast domain run at a horizontal resolution of 4 km is shown by the black box, the Southern California Current domain run at 1 km is shown by the blue box, and the SCB domain run at 0.3 km is shown by the red box. Colors show topography from the 4 km simulation. Adapted from (26).



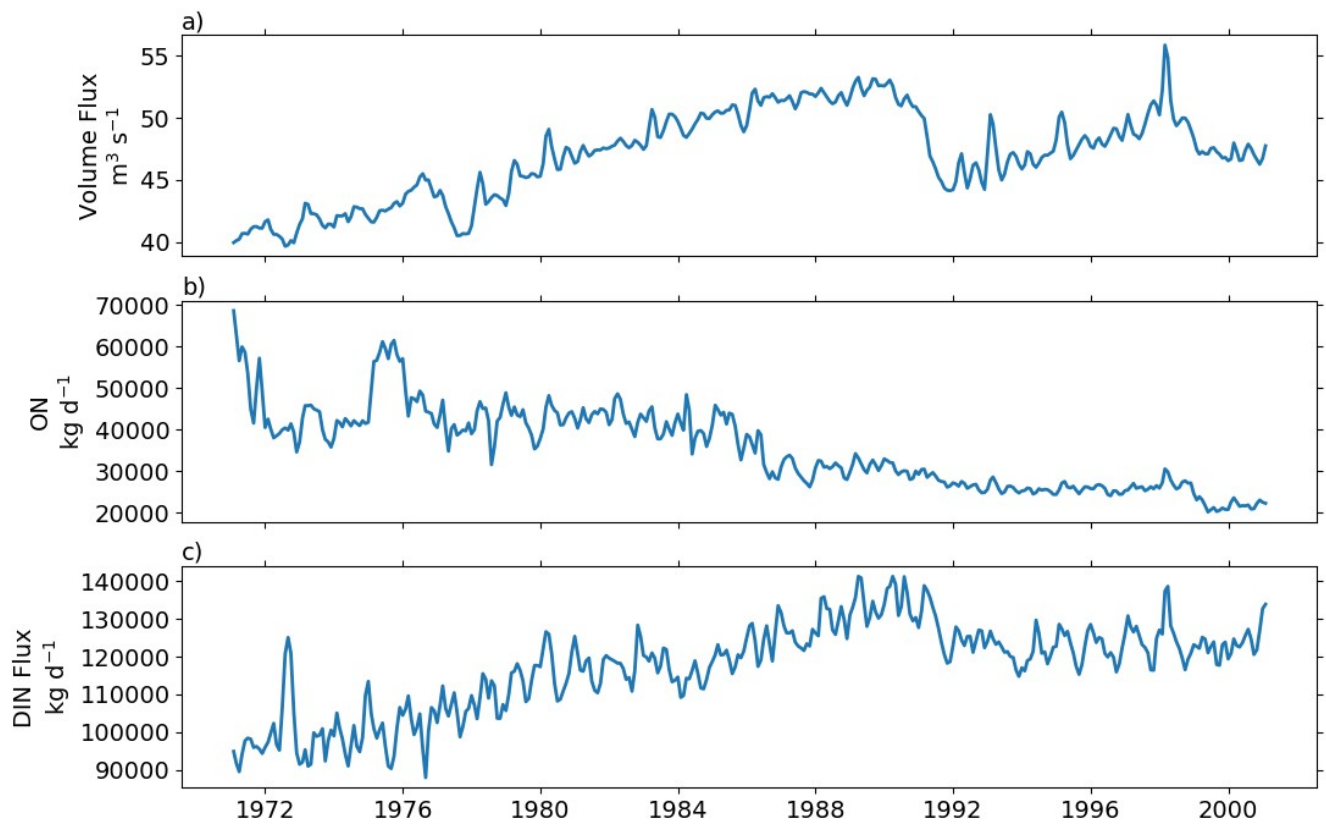

**Fig. S3.** Time series of all large POTW summed a) volume flux, b) organic N flux and c) dissolved inorganic N flux for 1971-2000.

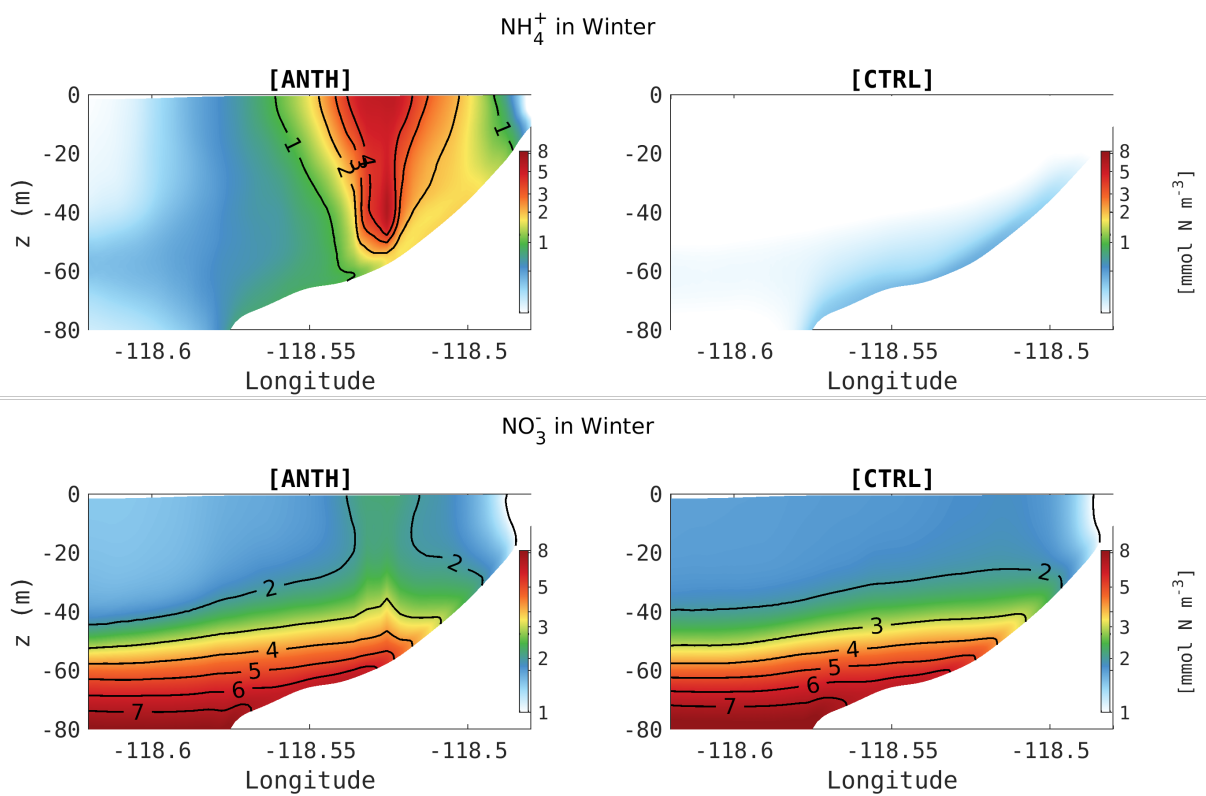

**Fig. S4.** Comparison of ANTH vs CTRL runs expressing concentrations of ammonium and nitrate along a cross-section in Santa Monica bay. The concentration is an average during winters. The left panels are the anthropogenic runs (ANTH), the right panels are control run (CTRL). The top panels ammonium concentrations, and the bottom are the nitrate concentrations. These panels express the transport of nitrate and ammonium to the upper layer by the buoyant plume.

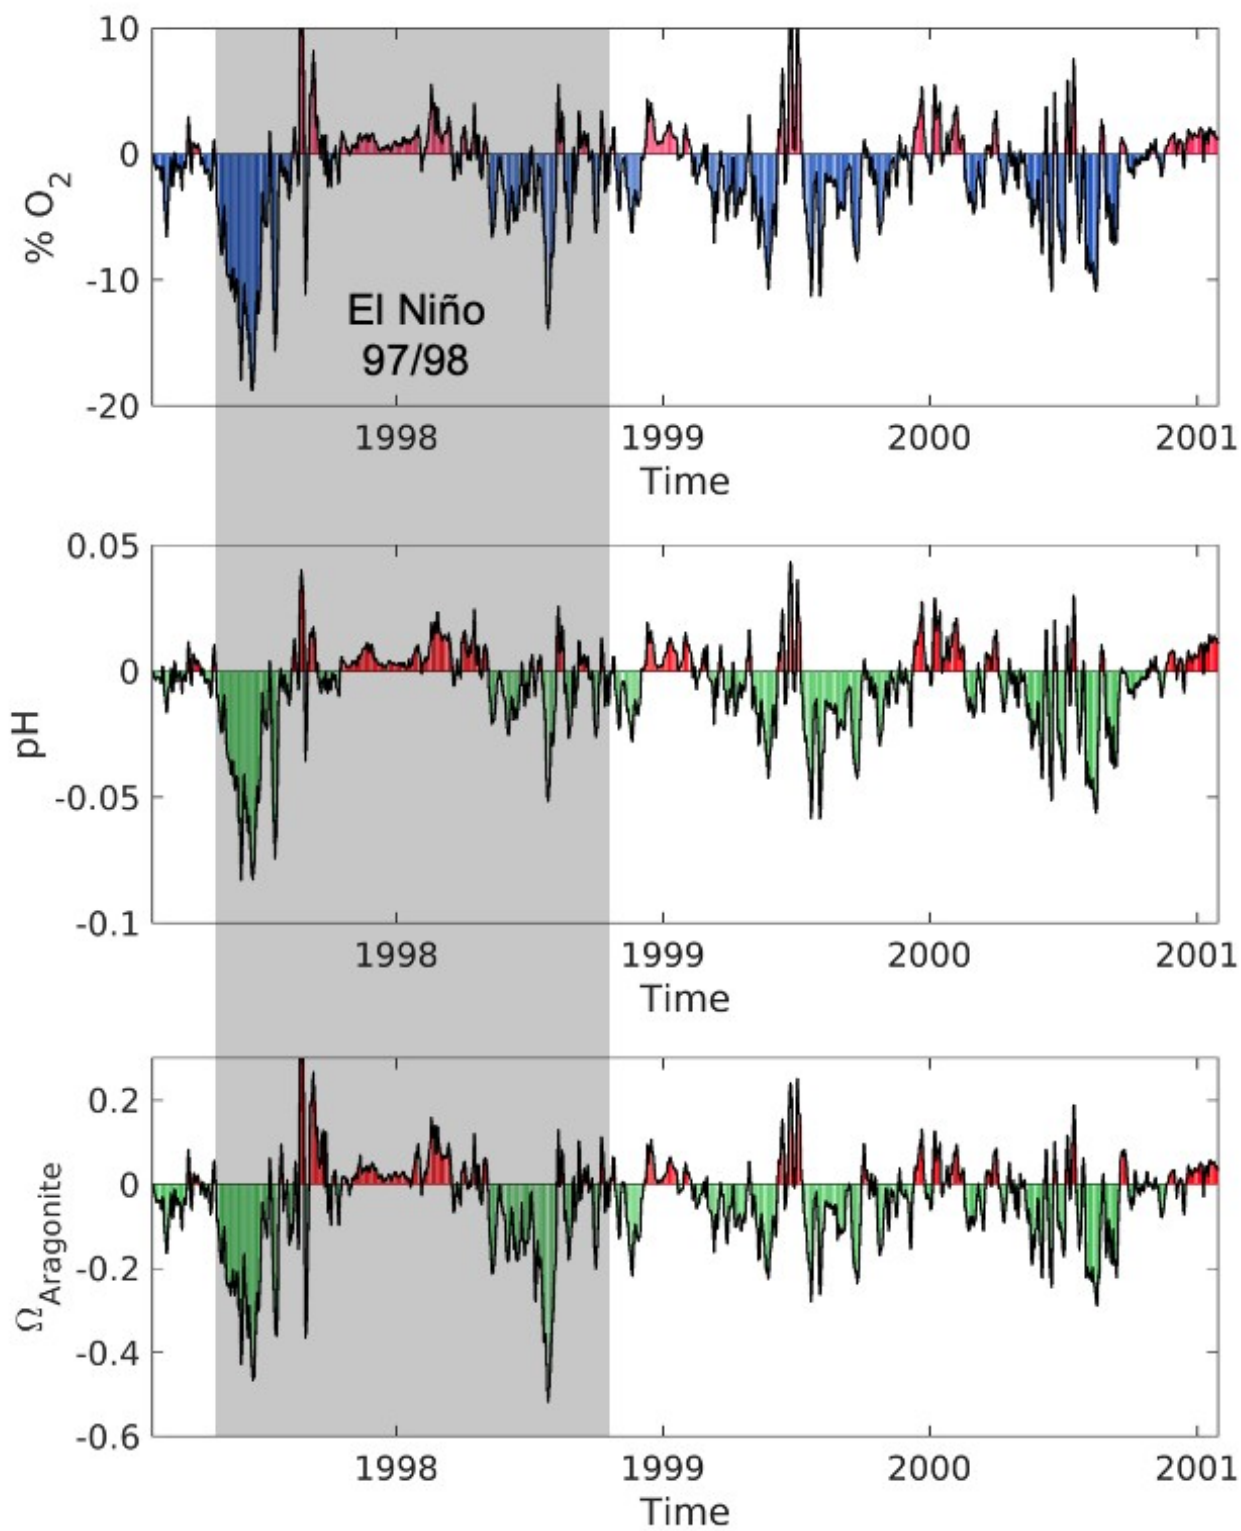

**Fig. S5.** Time series of the percent difference (ANTH - CTRL / CTRL) in Santa Monica Bay at 40 m depth between Feb 1997 and Jan 2001. The shaded region shows the El Niño time period. Upper: oxygen, middle: pH, lower: omega aragonite. Note the depletion of subsurface oxygen caused by the increased respiration of exported organic matter developed by eutrophication.

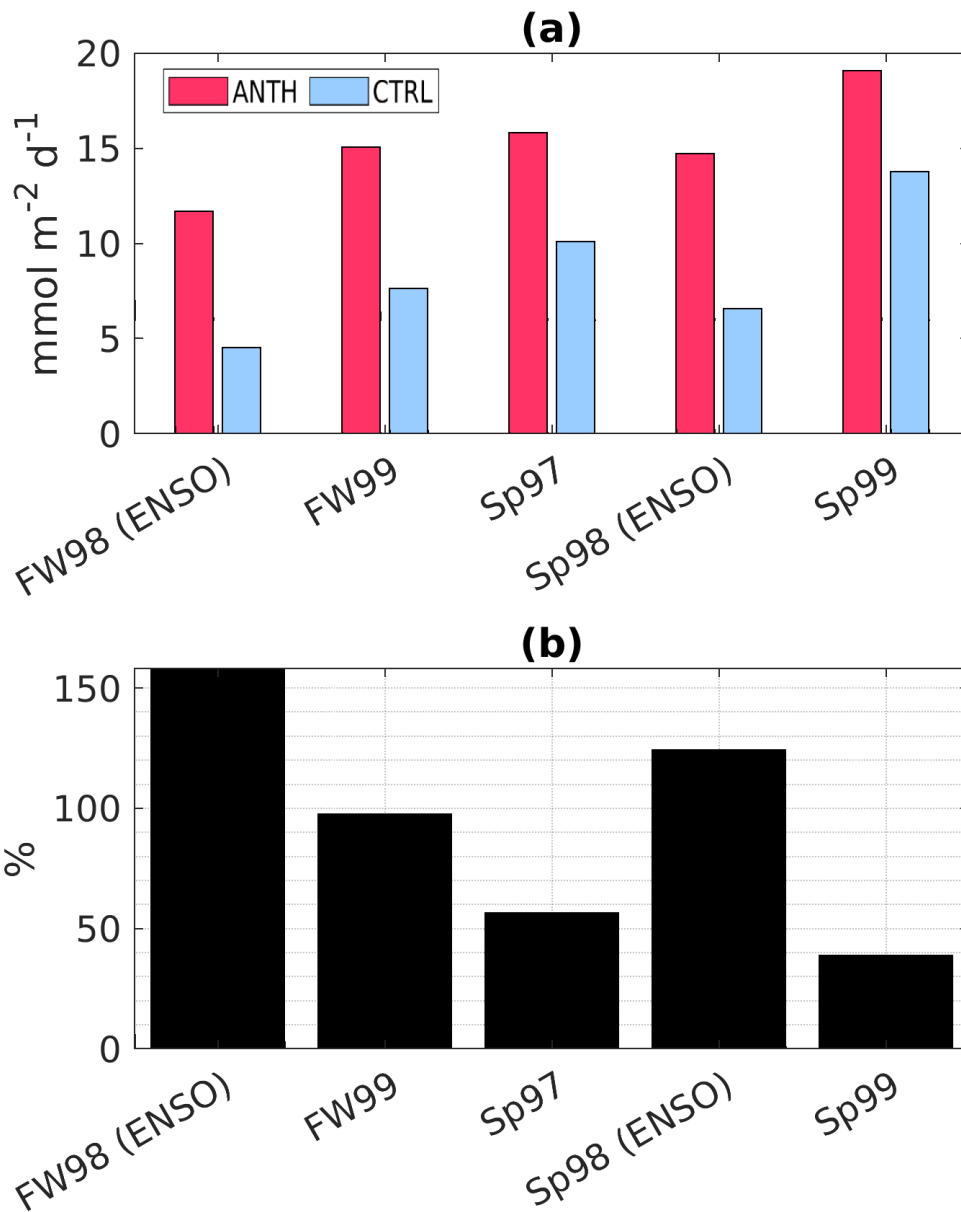

**Fig. S6.** (a) Seasonal vertically-integrated primary production showing the strong effect of El Niño 98. S is spring [March to June], W is fall to winter period [October to February]. (b) is the fraction of primary production between ANTH/CTRL. Winter and spring of 1998 are the seasons with the greatest change by anthropogenic (+100%). ENSO season presents a strong stratification and weak nutrients supply by upwelling, the main delivery of inorganic nutrients is then provided by anthropogenic sources.

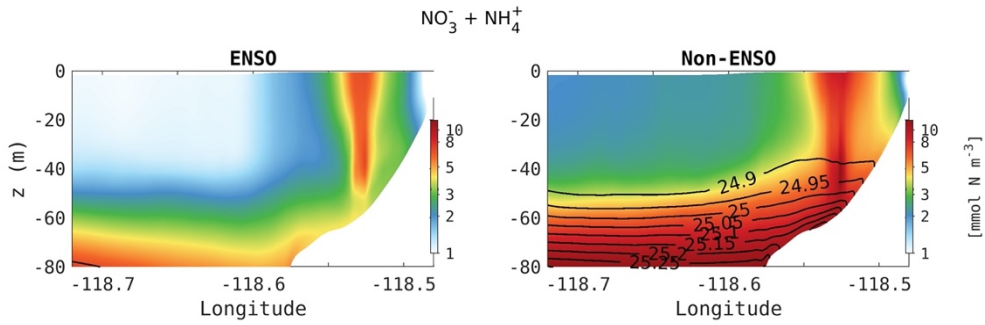

**Fig. S7.** Comparison of nitrate in winter during El Niño (ENSO in 1998) and a non-ENSO year (1999) in January and February in Santa Monica Bay. The isolines are the water density lines. The cross sections illustrate that the pycnocline is much deeper during ENSO, therefore, the only source of nutrients in the upper layer of Santa Monica Bay during ENSO comes from POTW submarine pipes. While during 1999, the source if inorganic nitrogen combines from deep ocean and POTW.

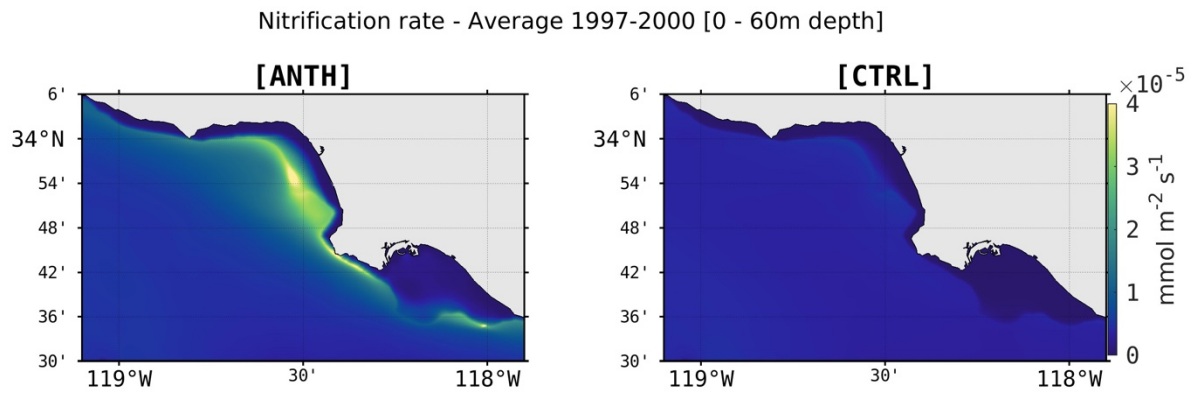

**Fig. S8.** Multi-year (1997-1999) averages of integrated nitrification in Los Angeles region. It shows the intensified nitrification rate at the locations of the submarine pipes.

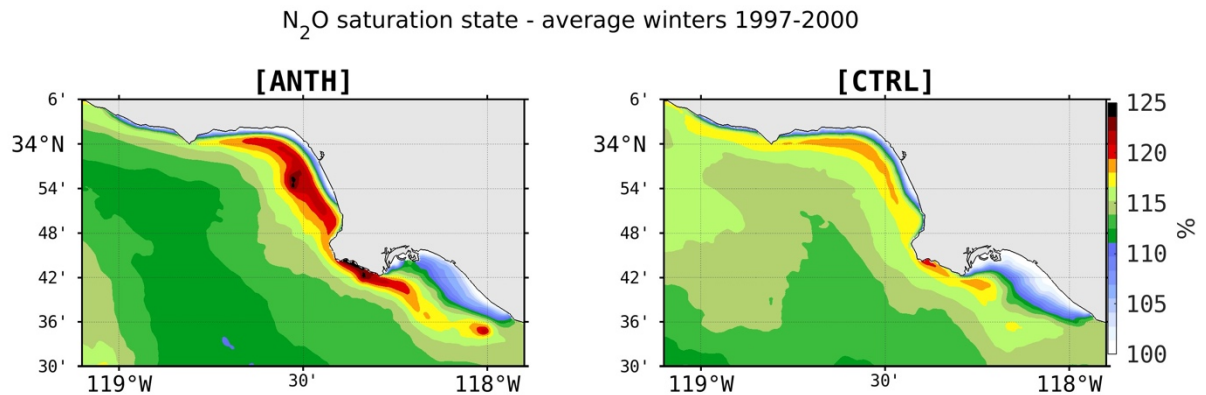

**Fig. S9.** Surface  $N_2O$  saturation state averaged over three winters [1997-1999]. It shows local increase of surface  $N_2O$  saturation state in the location of the intensified  $NH_4^-$  plume. The excess in  $N_2O$  saturation state in ANTH run results from the intensification of the nitrification rates as shown in S8.

Growth depth of *Macrocystis pyrifera*

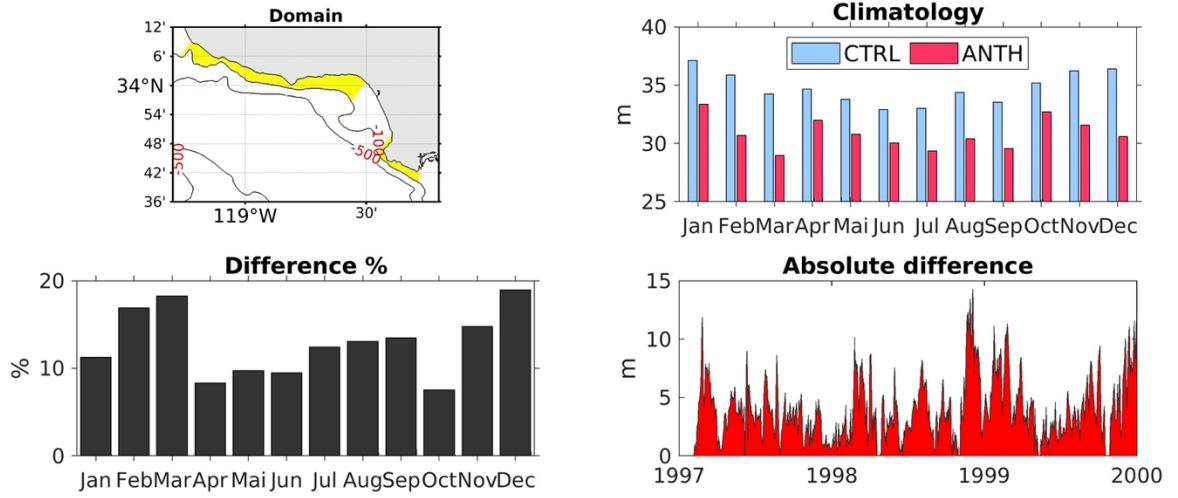

**Fig. S10.** Evolution of the tolerance depth of giant kelp *Macrocystis pyrifera* in San Pedro and Ventura shelves (as shown in yellow in the domain panel, top left.). Top right panel shows a climatology of the tolerance depth of *Macrocystis pyrifera* in CTRL run Vs ANTH run. Bottom left panel illustrates a climatology (1997-1999) of the relative change in the tolerance depth of *Macrocystis pyrifera* shown in the top right panel. The bottom right panel is the absolute change of the tolerance depth of *Macrocystis pyrifera*. These analysis are showing the possible change caused by the eutrophication.

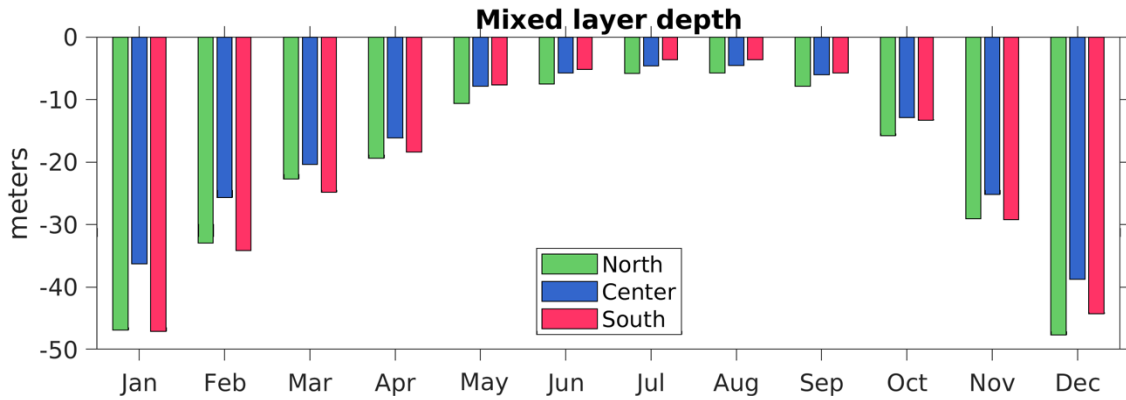

**Fig. S11.** Climatology of the mixed layer depth in the south (San Diego area), center (Los Angeles coast) and north (Santa Barbara coast) of the SCB.
